# Supplementary material for: Myoepithelial progenitors as founder cells of hyperplastic human breast lesions upon PIK3CA transformation
Source: PubMed Central journal article supplement (PMC8913783; doi:10.1038/s42003-022-03161-x), 2022-03-10
Supplement: 42003_2022_3161_MOESM3_ESM.pdf [file 42003_2022_3161_MOESM3_ESM.pdf]

## Description of Additional Supplementary Files

**File name:** Supplementary Data 1

**Description:** DEGs in clusters 0 to 9.

**File name:** Supplementary Data 2

**Description:** DEGs after exclusion of contaminating clusters 7, 8, and 9 including DEGs encoding surface proteins and DEGs specific for anatomic origin.

**File name:** Supplementary Data 3

**Description:** Source data for graphs and charts.
